# Supplementary material for: Local scale structural changes of working OFET devices
Source: Royal Society of Chemistry journal article supplement (doi:10.1039/c9nr07905j), 2019-11-08
Supplement: c9nr07905j1.pdf [file c9nr07905j1.pdf]

## Local scale structural changes of working OFET devices – Supporting information

L. S. Grodd, E. Mikayelyan, T. Dane, U. Pietsch and S. Grigorian

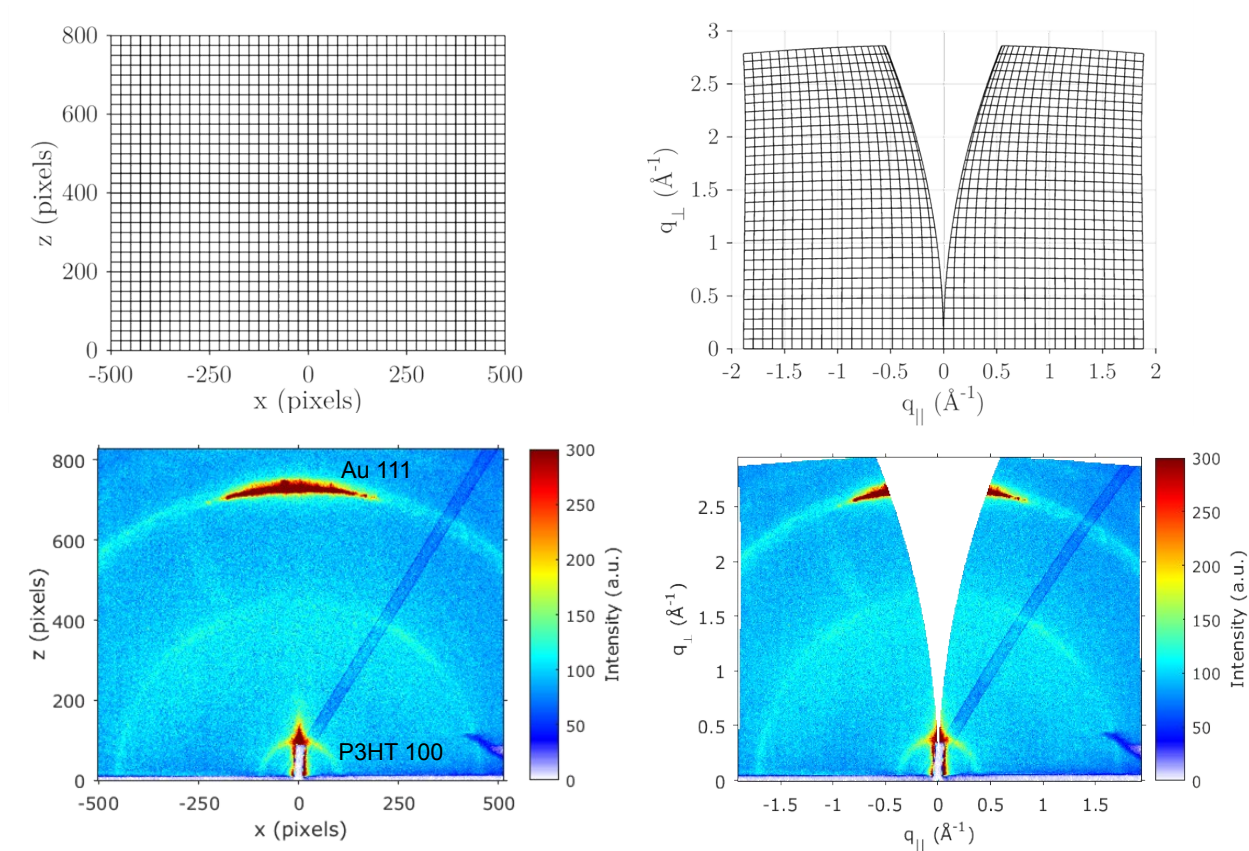

Figure S1: Conversion of nanoGIXD pattern from 2D detector image to q-space map

Polar maps facilitate the determination of azimuthal line profiles. For this reason the q-space maps are converted from cartesian to polar coordinates.

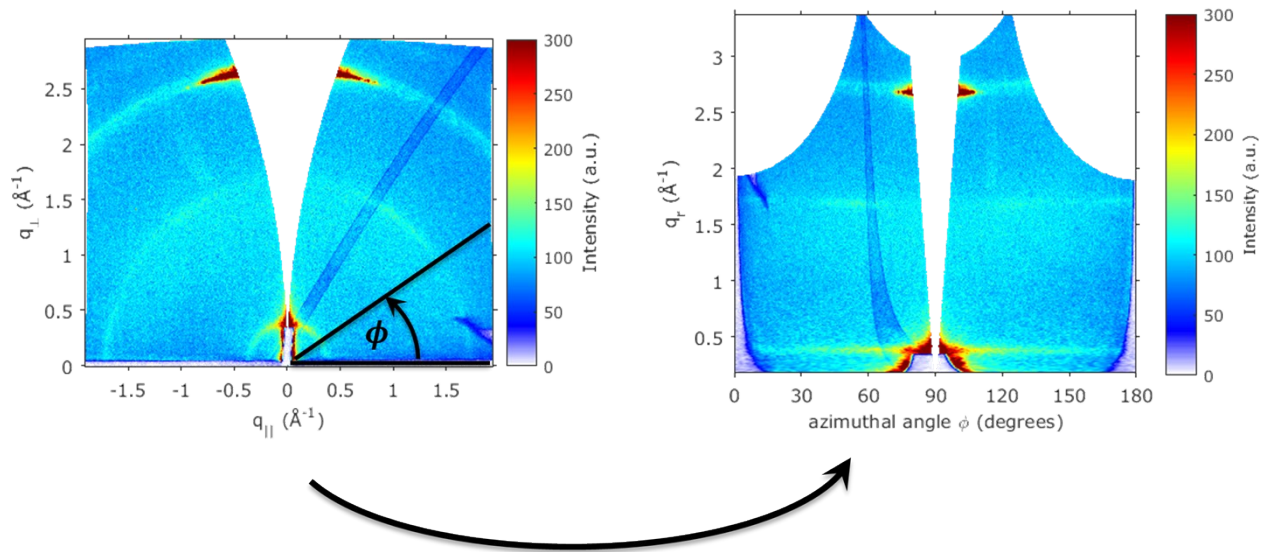

Figure S2: Conversion from Cartesian to polar map

Due to geometrical constraints as seen in the figures above the accessible integration region is limited from  $11^\circ$  to  $44^\circ$ .
